# Supplementary material
Source: publisher figshare collection journal article supplement (https://sage.figshare.com/ndownloader/files/12183899)
Supplement: Supplementary file 1 [file 12183899]

**Table 1. Age distribution and severity of AD in eligible participants**

|                                   |          |               |
|-----------------------------------|----------|---------------|
| <b>Age Distribution (years)</b>   | 0 – 5    | 54% (247/458) |
|                                   | 6 – 12   | 31% (142/458) |
|                                   | 13 – 18  | 15% (69/458)  |
| <b>Severity of AD<sup>a</sup></b> | Moderate | 65% (299/458) |
|                                   | Severe   | 35% (166/458) |

<sup>a</sup> Severity of AD defined as mild (areas of dry skin, infrequent itching, with or without small areas of redness), moderate (areas of dry skin, frequent itching, and redness with or without broken or localized skin thickening) and severe (widespread areas of dry skin, incessant itching, and redness with or without broken skin, extensive skin thickening, bleeding, oozing, cracking and alteration of pigmentation).
